# Supplementary material for: Non-covalent functionalization of carbon nano-onions with pyrene–BODIPY dyads for biological imaging
Source: Royal Society of Chemistry journal article supplement (doi:10.1039/c5ra07683h), 2015-01-01
Supplement: c5ra07683h1.pdf [file c5ra07683h1.pdf]

# Non-Covalent Functionalization of Carbon Nano-Onions with Pyrene-BODIPY Dyads for Biological Imaging

*Juergen Bartelmess,<sup>a,§</sup> Marco Frasconi,<sup>a,§</sup> Preethi B. Balakrishnan,<sup>b</sup> Angelo Signorelli,<sup>a</sup>*

*Luis Echegoyen,<sup>c</sup> Teresa Pellegrino,<sup>b</sup> Silvia Giordani<sup>\*,a</sup>*

<sup>a</sup> Istituto Italiano di Tecnologia (IIT), Nano Carbon Materials, Via Morego 30, 16163 Genova, Italy.

<sup>b</sup> Istituto Italiano di Tecnologia (IIT), Drug Discovery and Development, Via Morego 30, 16163 Genova,  
Italy.

<sup>c</sup> University of Texas at El Paso, Department of Chemistry, 500 W. University Ave., El Paso, TX 79968,  
USA.

§These authors contributed equally to this work.

|        |                                                                                                                |
|--------|----------------------------------------------------------------------------------------------------------------|
| S3-S4  | Materials, instrumentation and methods                                                                         |
| S4     | Table S1                                                                                                       |
| S5     | Comparison <i>p-CNO/3</i> and BODIPY <b>3</b> in DMSO – Absorption and Fluorescence                            |
| S6     | ATR FT-IR spectrum of <b>3</b> , <i>p-CNO</i> , <i>p-CNO/3</i> , <i>benz-CNO</i> and <i>benz-CNO/3</i> hybrids |
| S7     | Viability Assay                                                                                                |
| S8-S12 | Cellular Imaging                                                                                               |
| S13    | References                                                                                                     |

## Materials, instrumentation and methods.

Absorption spectra were recorded on a Varian Cary 300scan UV-Visible spectrophotometer or on an Agilent Cary 8454 UV-Vis diode array spectrophotometer. Corresponding fluorescence spectra were taken on a Varian Cary Eclipse fluorescence spectrophotometer or on a Horiba Jobin Yvon Fluoromax-4 spectrofluorometer in 1.00 x 1.00 cm quartz glass cells. Fluorescence quantum yields were determined by the comparative method of Williams *et al.*<sup>1</sup> Toward this, the integrated fluorescence intensities of a known dye and the tested compound were compared and fluorescence quantum yields were calculated using the following equation:

$$\Phi_x = (\Phi_{st}) (\text{Grad}_x / \text{Grad}_{st}) (\eta_x^2 / \eta_{st}^2)$$

st and x denotes the standard and test respectively, while  $\Phi$  is the fluorescence quantum yield. Grad is the gradient obtained from the plot of integrated fluorescence intensity vs. absorbance of the dye at the excitation wavelength.  $\eta$  represents the refractive index of the used solvents. The fluorescence quantum yields of **3** was measured relative to *meso*-phenol BODIPY with  $\Phi_{st} = 0.64$  in toluene at an excitation wavelength of 485 nm.<sup>2</sup>

For the fluorescence lifetime measurements, a home-built scanning confocal microscope was used.<sup>3</sup> The excitation source was a super-continuum laser producing 50 ps pulses. The 488 nm excitation beam used for the measurements was obtained by spectrally filtering (Bright Line HC 488/6 nm, AHF analysentechnik) the super-continuum beam. Successively, the beam was reflected by a dichroic mirror (zt-488-RDC, AHF analysentechnik) and focused by an oil immersion objective. The fluorescence was collected by the same objective. The histograms of photon arrival times were accomplished by a time-correlated single photon card (TCSPC) (SPC-

830, Becker & Hickl). The fitting to the TCSPC data included a single-exponential decay and a convolution with the instrument response function.

ATR FT-IR spectroscopy was carried out on a Bruker Vertex 70v FT-IR spectrometer equipped with a Platinum ATR accessory.

The Accurate Mass measurements (HRMS) were performed on a Waters SYNAPT G2 High Resolution Mass Spectrometry instrument equipped with an Electrospray Ionization interface and coupled to a Waters ACQUITY UPLC. Electrospray ionization in positive mode was applied in the mass scan range 50-1200 Da. The analysis were performed on a Waters ACQUITY UPLC BEH C18 column 100 x 2.1 mm ID (particle size 1.7  $\mu\text{m}$ ) with an in-line filter. The mobile phase was 0.1% formic acid in  $\text{H}_2\text{O}$  and 0.1% formic acid in acetonitrile.

NMR spectroscopy was performed on a Bruker Avance III 400 MHz system (400.13 MHz for  $^1\text{H}$  and 100.62 MHz for  $^{13}\text{C}$ ) in  $\text{CDCl}_3$ , purchased from Sigma-Aldrich.

**Table S1.** Spectroscopic data of **3** in toluene and DMSO.

| Solvent | $\lambda_{\text{Abs max}}$<br>[nm] | $\epsilon$ [ $\text{M}^{-1} \text{cm}^{-1}$ ] | $\lambda_{\text{Em max}}$<br>[nm] | $\Phi_{\text{F}}^*$ | Stokes Shift<br>[nm] | $\tau_{\text{F}}$ [ns] |
|---------|------------------------------------|-----------------------------------------------|-----------------------------------|---------------------|----------------------|------------------------|
| toluene | 503                                | 94.7                                          | 515                               | 0.72                | 12                   | 3.35 +/- 0.02          |
| DMSO    | 501                                | 87.0                                          | 513                               | 0.71                | 12                   | 3.75 +/- 0.05          |

\* measured relative to 4,4-difluoro-8-(4-(hydroxy)phenyl)-1,3,5,7-tetramethyl-4-bora-3a,4a-diaza-s-indacene, which is reported with a fluorescence quantum of 0.64 in toluene.<sup>2</sup> Excitation at 485 nm.

**Figure S1.** Comparison of the absorption and fluorescence spectra of *p-CNO/3* (red) of a mass concentration of 10  $\mu\text{g/mL}$  and pyrene-BODIPY **3** (purple) in DMSO. Both samples have a comparable absorption at the excitation wavelength of 490 nm.

Top: Absorption spectra. Bottom: Fluorescence spectra.

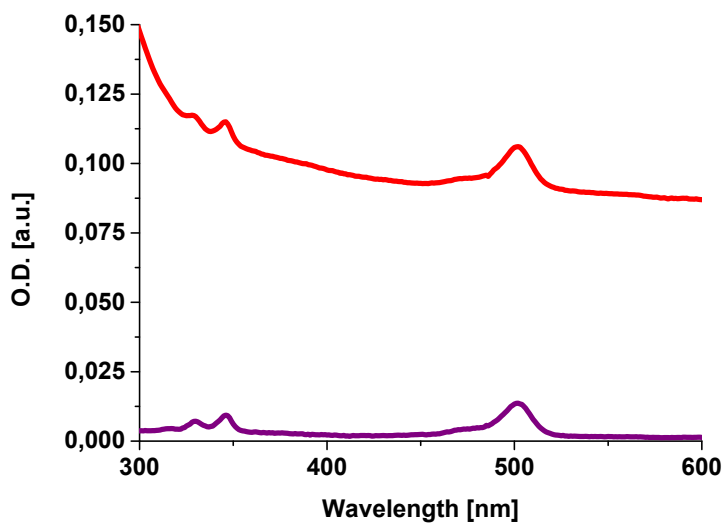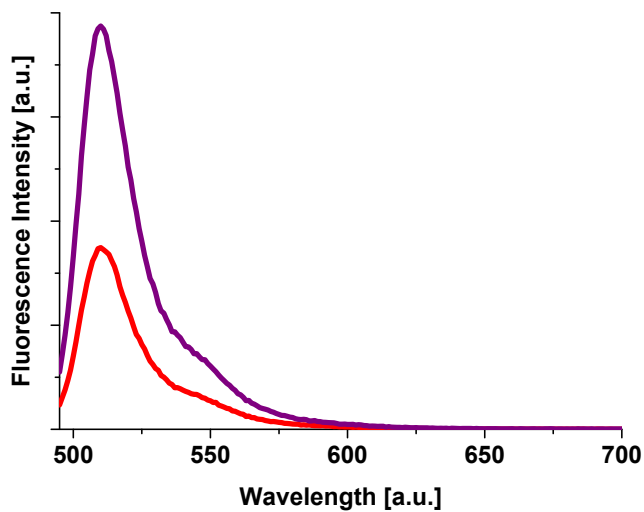

**Figure S2.** ATR FT-IR spectrum of *p*-CNO (dark red), *p*-CNO/3 (red), *benz*-CNO (dark blue) and *benz*-CNO/3 hybrids (blue).

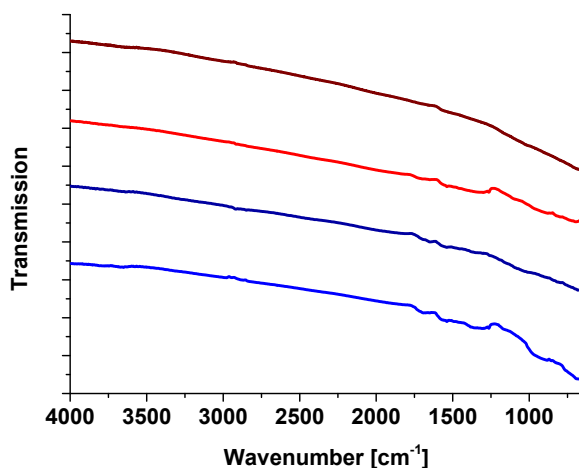

The IR spectrum of *p*-CNO (dark red) reveals the typical broad absorption of CNOs over the whole area without significant IR absorption bands. CNO functionalization with benzoic acid moieties (*benz*-CNO – dark blue) results in some weak bands between 600 and 1750 cm<sup>-1</sup>. The spectrum of *p*-CNO/3 (red) and *benz*-CNO/3 hybrids (blue) instead clearly shows BODIPY centered IR bands in the same area like the ones shown in the IR spectrum of **3** shown below. The resolution, however, is not high, a usual effect observed for all kinds of carbon nanomaterial / chromophore systems, due to the large background absorption of the carbon nanomaterial. No baseline correction was carried out.

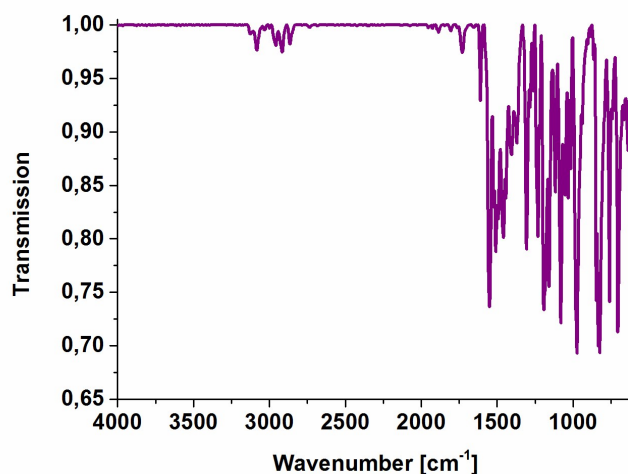

FTIR-spectrum of BODIPY-pyrene dyad **3**

## Viability Assay

**Figure S3.** Cellular viability of HeLa wt cells after exposure to different concentrations (2, 5, 10, 20  $\mu\text{g/ml}$ ) of *p*-CNO (A) and *benz*-CNO (B) after 12 (yellow), 24 (green), 48 (red) and 72 (black) hours of incubation at 37 °C.

**A)**

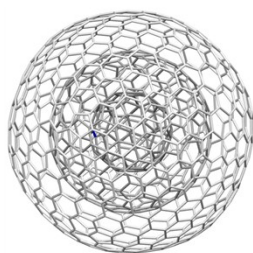

*p*-CNO

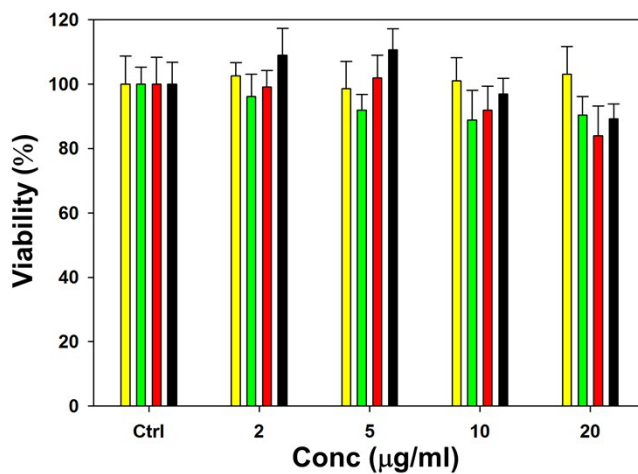

**B)**

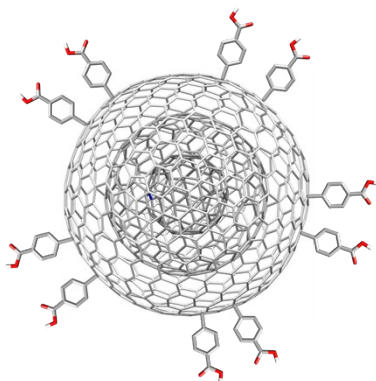

*benz*-CNO

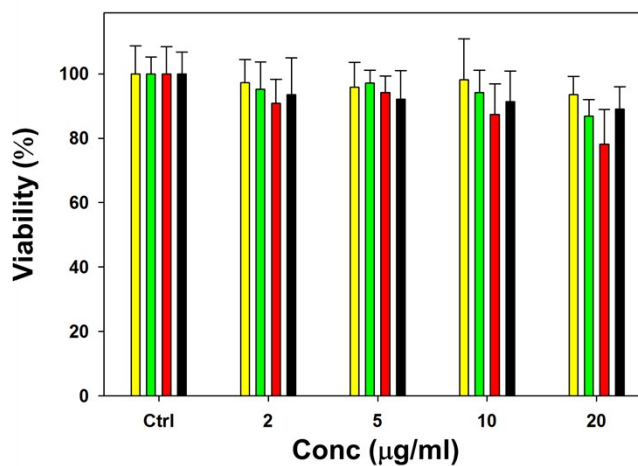

### ***Mechanism of Cellular Uptake***

HeLa cells, grown in the 24 well chamber plates, were treated with 500  $\mu\text{L}$  of medium with ***p-CNO/3*** at concentration of 2 and 10  $\mu\text{g/ml}$ . The cells were incubated for 30 min at 4  $^{\circ}\text{C}$  or 37  $^{\circ}\text{C}$ . The cells were then washed thoroughly with PBS, tagged with DAPI dye for nuclear staining and fixed using 4% paraformaldehyde. The coverslips containing the fixed cells were then retrieved and glued over a glass-slide for confocal microscopy imaging.

### ***Cellular Localization***

The cells were incubated for 30 min with 2, 5 and 10  $\mu\text{g/ml}$  of ***p-CNO/3*** in medium. After the treatment, all the wells containing cells were washed carefully with PBS to remove the adsorbed CNO samples. One set of cells were incubated for an extra 2 hours with fresh cell media. Then all of them were stained with LysoTracker Red DND-99, a dye that tags endosomes and lysosomes and Hoechst 33342 for live nuclear staining. The samples were then fixed following the same procedure described in previous section.



**Figure S4.** Confocal images of fixed HeLa cells incubated for 30 min with 2  $\mu\text{g/ml}$  (A,B), 5  $\mu\text{g/ml}$  (C,D), 10  $\mu\text{g/ml}$  (E,F) of *p*-CNO/3 at 37 °C. After washing the cells from the excess of *p*-CNO/3, the cells were stained and fixed.. Blue: Hoechst 33342; Red: LysoTracker Red DND-99 and Green: *p*-CNO/3. Merged image with the colocalization (yellow) of *p*-CNO/3 within the lysosomes. Scale bar 25 $\mu\text{m}$ .

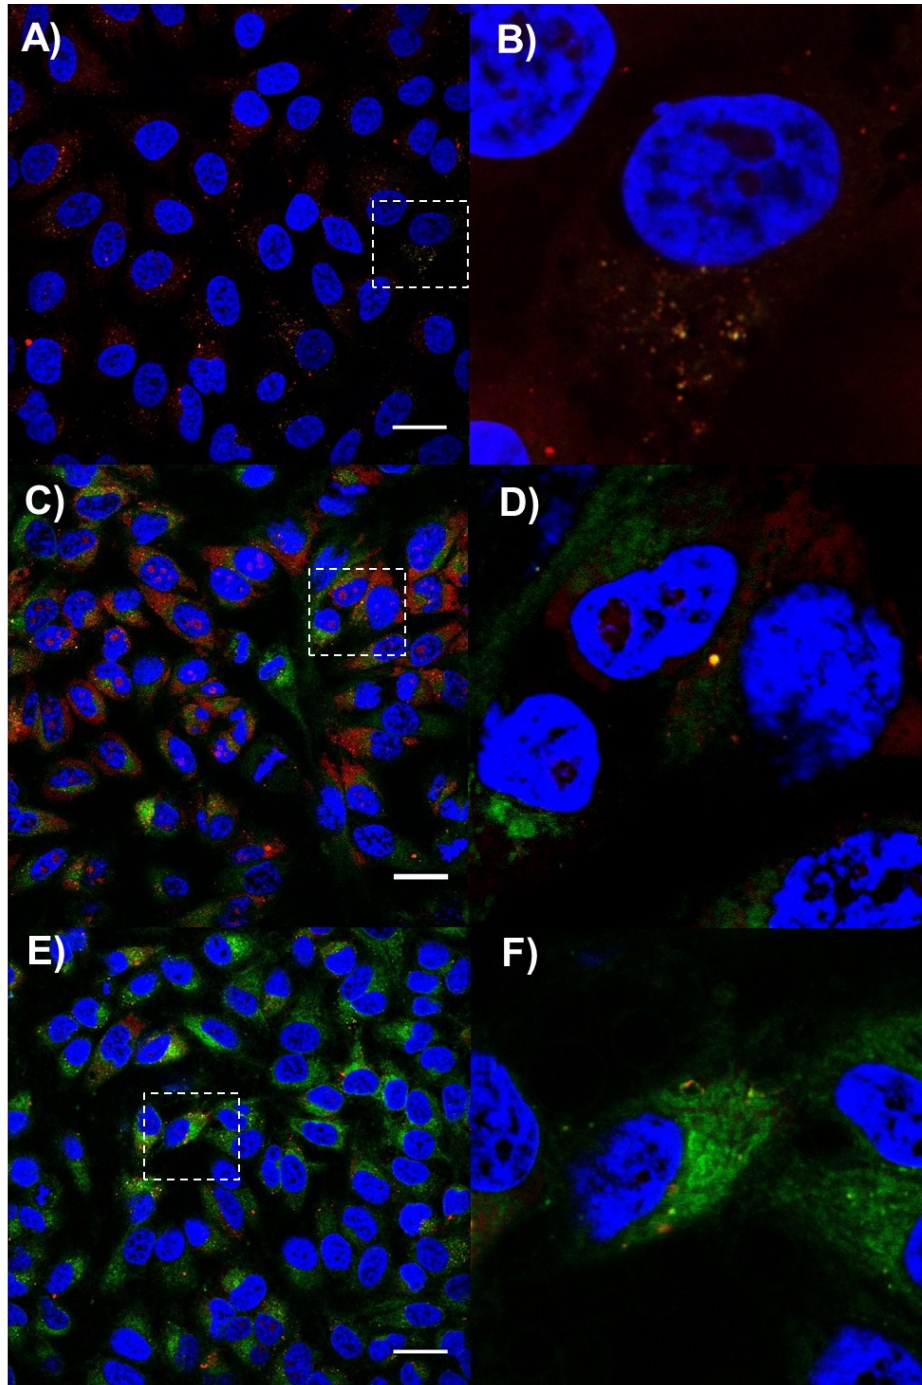

**Figure S5.** Confocal images of fixed HeLa cells incubated for 30 min with 2  $\mu\text{g/ml}$  (A,B), 5  $\mu\text{g/ml}$  (C,D), 10  $\mu\text{g/ml}$  (E,F) of *p*-CNO/3 at 37 °C. After washing the cells from the excess of *p*-CNO/3, allowed to stand in DMEM media for an additional 2h, washed, stained and fixed. Blue: Hoechst 33342; Red: LysoTracker Red DND-99 and Green: *p*-CNO/3. Merged image with the colocalization (yellow) of *p*-CNO/3 within the lysosomes. Scale bar 25 $\mu\text{m}$ .

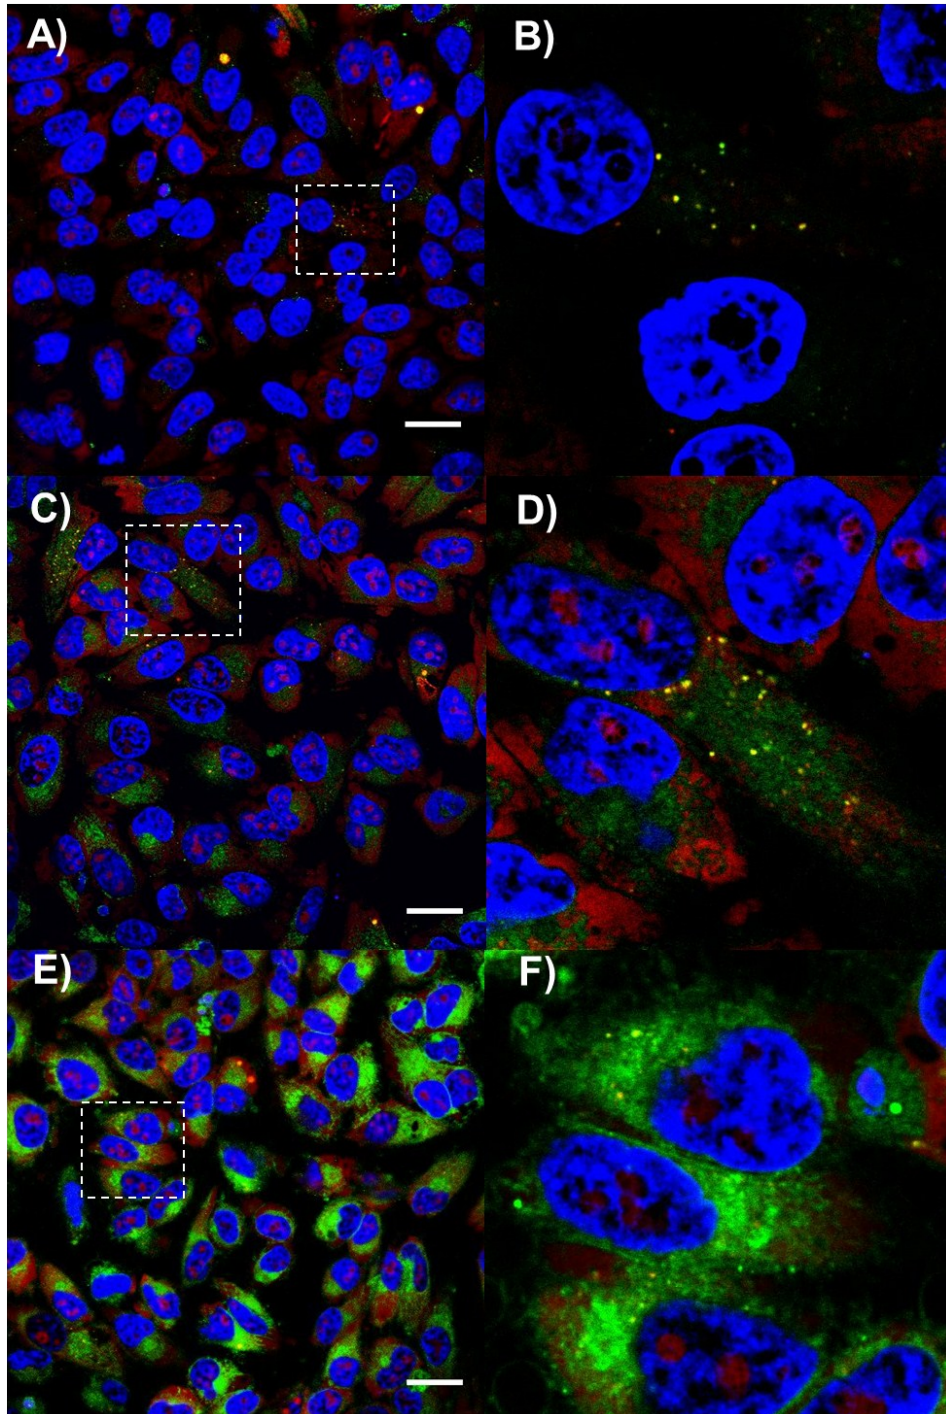

**Figure S6.** Confocal images of fixed HeLa cells incubated for 30 min with 2  $\mu\text{g/ml}$  of *p*-CNO/3 at 4 °C (A,B) and 37 °C (C,D). Cells were stained with Hoechst (blue). Scale bar 25  $\mu\text{m}$ .

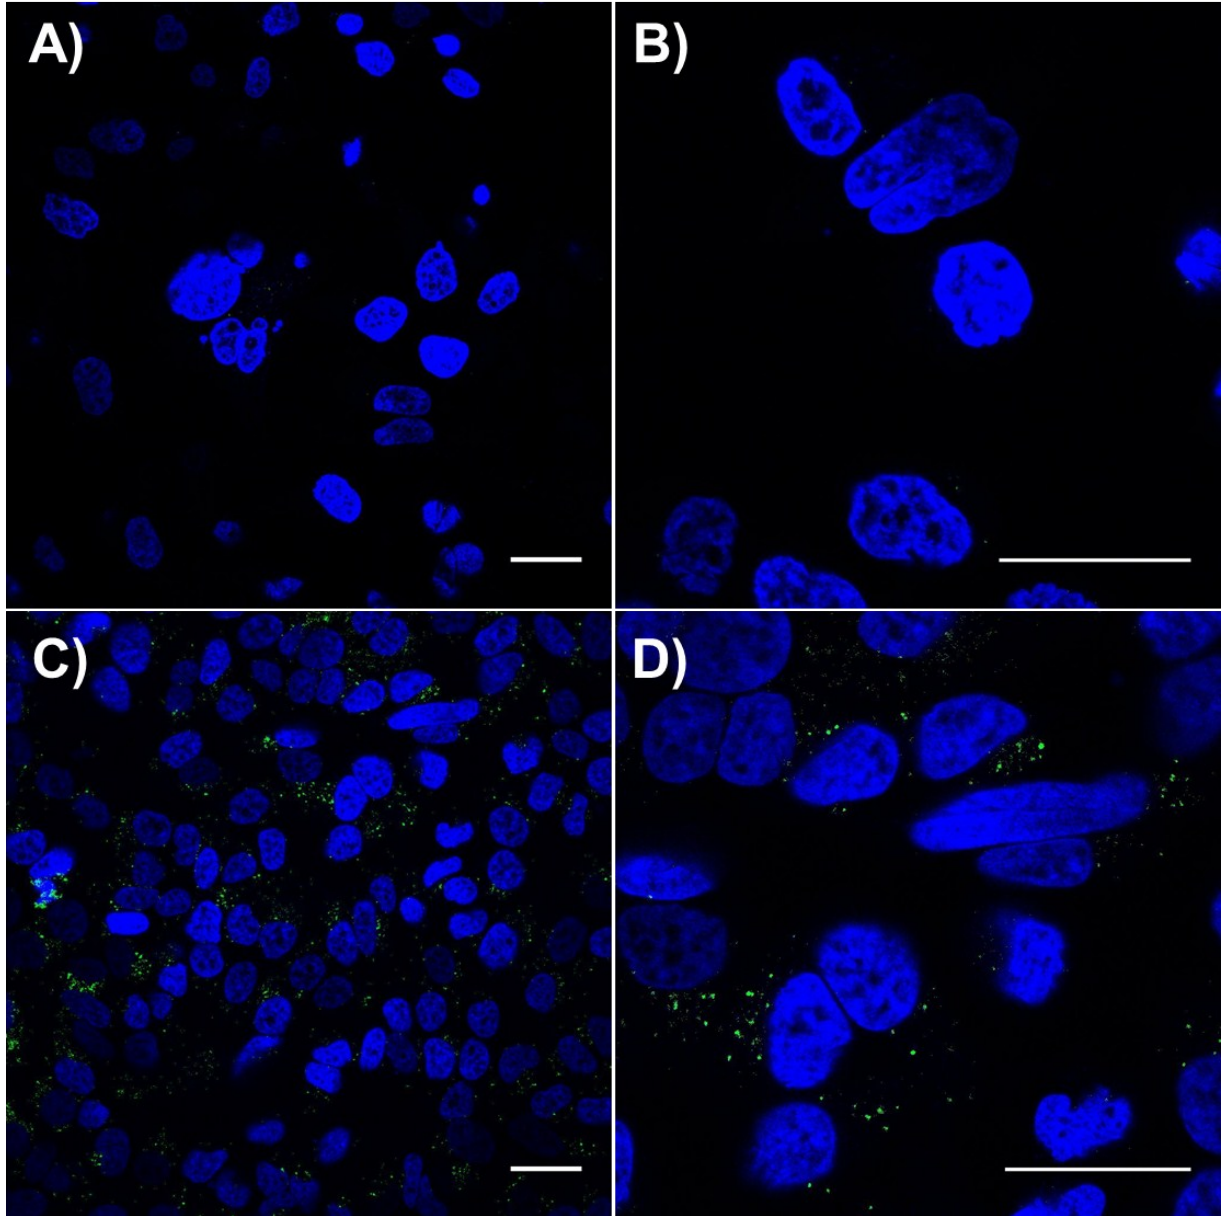

**Figure S7.** Confocal images of fixed HeLa cells incubated for 30 min with 10  $\mu\text{g/ml}$  of *p*-CNO/3 at 4 °C (A,B) and 37 °C (C,D). Cells were stained with Hoechst (blue). Scale bar 25  $\mu\text{m}$ .

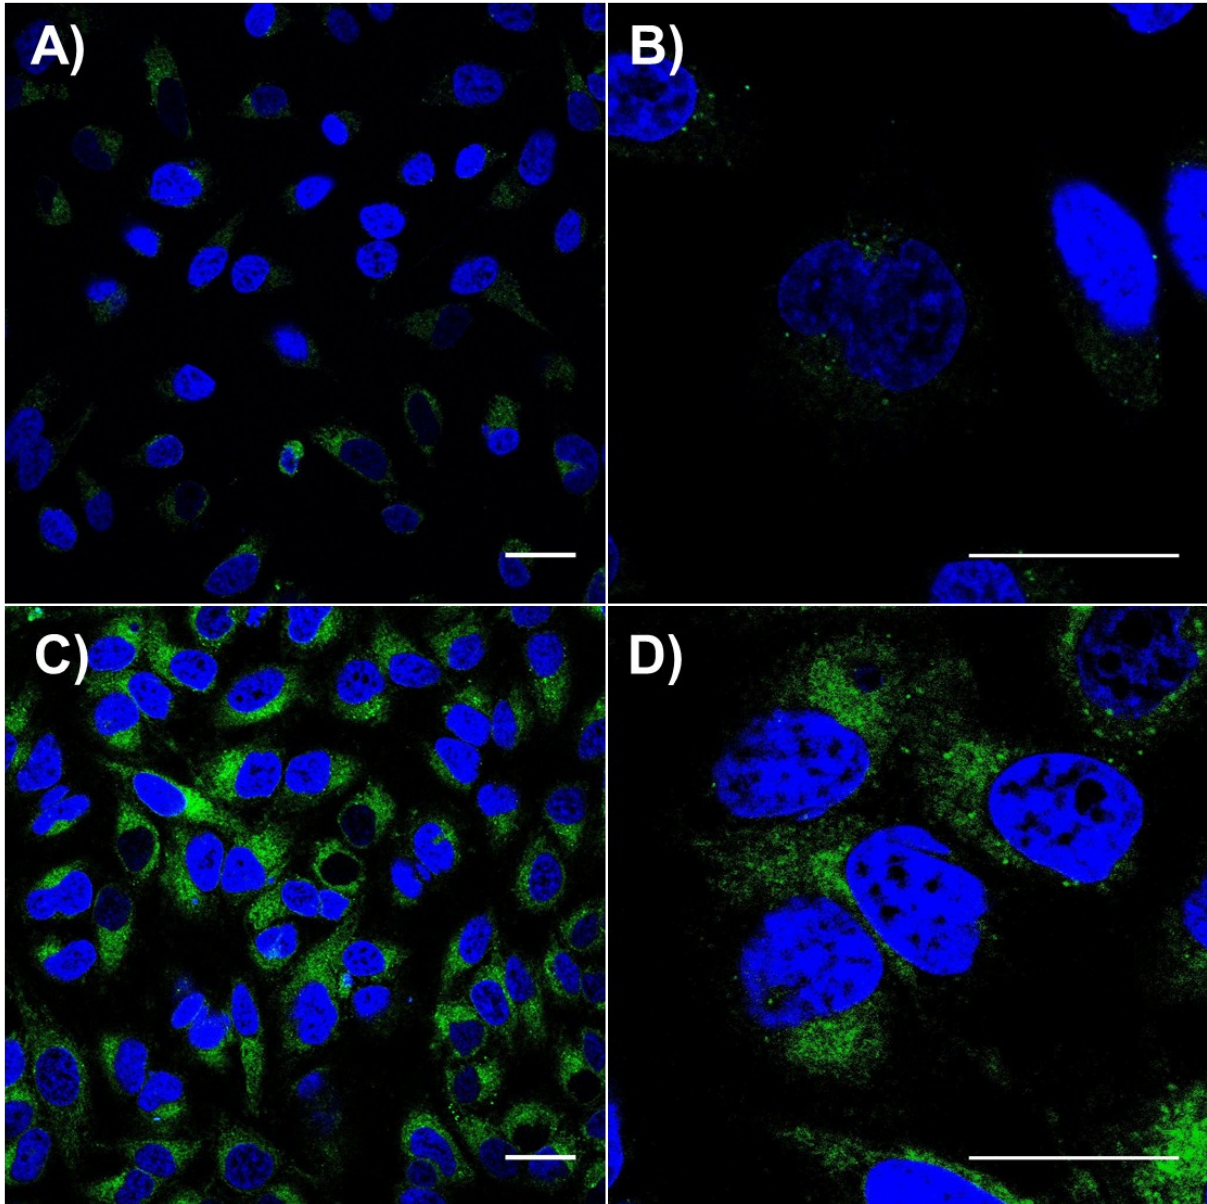

## References

---

- 1 A. T. R. Williams, S. A. Winfield, J. N. Miller, *Analyst* **1983**, *108*, 1067.
- 2 Lazarides, T.; Kuhri, S.; Charalambidis, G.; Panda, M. K.; Guldi, D. M.; Coutsolelos, A. G. *Inorg. Chem.* **2012**, *51*, 4193.
- 3 Vicidomini, G.; Coto Hernandez, I.; d'Amora, M.; Cella Znacchi, F.; Bianchini, P.; Diaspro, A. *Methods* **2014**, *66*, 124.
